# Supplementary material
Source: PubMed Central journal article supplement (PMC4386336)
Supplement: pnas.201419502SI.pdf [file pnas.201419502SI.pdf]

# Supporting Information

Hasumi et al. 10.1073/pnas.1419502112

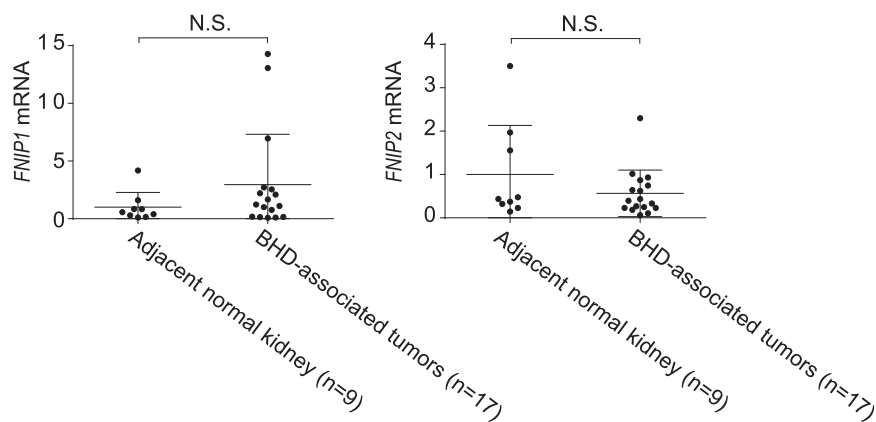

**Fig. S1.** No significant difference in FNIP1 or FNIP2 expression in BHD-associated tumor relative to adjacent normal kidney. FNIP1 and FNIP2 expression levels in BHD-associated tumors relative to adjacent normal kidney were investigated using real-time PCR. There was no significant difference in FNIP1 or FNIP2 expression in BHD-associated tumors relative to adjacent normal kidney. Primer sequences are as follows: FNIP1-forward, 5'-TTTGTTCCTCCCACTGCTTCCA-3'; FNIP1-reverse, 5'-AGTAGCAGCAGCTCATTCTTGGG-3'; FNIP2-forward, 5'-CTCACTTCTGGCGGGCTACT-3'; FNIP2-reverse, 5'-GGTCCCATGAAGCACAAGATC-3'. Signal intensity was normalized using GAPDH: GAPDH-forward, 5'-TGCACCACCAACTGCTTAGC-3'; GAPDH-reverse, 5'-GGCATGGACTGTGGTCATGAG-3'. Mean  $\pm$  SD,  $n = 9$  for adjacent normal kidney and  $n = 17$  for BHD-associated tumors. Student  $t$  test (two-sided). N.S.; no significance.
